# Supplementary material for: Eosinophil‐derived IL‐4 is necessary to establish the inflammatory structure in innate inflammation
Source: PubMed Central journal article supplement (PMC9906331; doi:10.15252/emmm.202216796), 2022-12-21
Supplement: EMMM-15-e16796-s002.pdf [file EMMM-15-e16796-s002.pdf]

## Appendix table and figures

- Table S1: Antibodies used for MELC and FACS analysis
- Fig. S2: MELC-based bioinformatic analysis of macrophage polarization
- Fig. S3: Gating strategies for FACS analysis
- Fig. S4: MELC-based neighborhood analysis of zymosan and macrophage subpopulations
- Fig. S5: MELC analysis of the distribution of dendritic cells and eosinophils
- Fig. S6: The anti Siglec F-depletion antibody does not interfere with binding of the eosinophil detection antibody
- Fig. S7: IL1a and IL6 levels after eosinophil-depletion
- Fig. S8: Neutrophil numbers in blood after eosinophil-depletion in naive mice

## Appendix Table S1:

**Table ST1:** Antibodies used for MELC and FACS analysis

| Target                                       | Company          | Clone number   | Order number  |
|----------------------------------------------|------------------|----------------|---------------|
| CD3                                          | Miltenyi Biotec  | REAG1          | 130-109-838   |
| CD4                                          | Southern Biotech | L3T4           | 1540-02       |
| CD8                                          | BD Pharmingen    | 53-6.7         | 553030        |
| CD11b                                        | BioRad           | M1/70.15       | MCA74F        |
| CD11c                                        | Miltenyi Biotec  | N418           | 130-102-799   |
| CD19                                         | BDPharmingen     | 1D3            | 557398        |
| CD22                                         | Miltenyi Biotec  | Cy34.1         | 130-102-576   |
| CD25                                         | Miltenyi Biotec  | 7D4            | 130-102-550   |
| CD29                                         | Miltenyi Biotec  | HM $\beta$ 1-1 | 130-102-557   |
| CD31                                         | BD Biosciences   | MEC13.3        | 553373        |
| CD41                                         | AbDSerotec       | MWRReg30       | MCA2245F      |
| CD45                                         | Miltenyi Biotec  | 30F11.1        | 130-116-535   |
| CD54                                         | Biolegend        | YN1/1.7.4      | 116105        |
| CD80                                         | Biolegend        | 16-10A1        | 104706        |
| CD86                                         | Biolegend        | GL-1           | 105002        |
| CD117                                        | Bioss            |                | bs-10005R-Cy5 |
| CD127                                        | eBiosciences     | A7R34          | 11-1271-82    |
| CD206                                        | Biolegend        | C068C2         | 141708        |
| CD209                                        | eBiosciences     | LWC06          | 11-2092-80    |
| Cytokeratin                                  | eBiosciences     | AE1/AE3        | 53-9003-82    |
| CD335                                        | Invitrogen       | 29A1.4         | 11-3351-82    |
| F4-80                                        | Biolegend        | BM8            | 123107        |
| GATA3                                        | Santa Cruz       | HG3-31         | sc-268        |
| IFN $\gamma$                                 | eBioscience      | XMG1.2         | 12-7311-41    |
| IL1b                                         | Thermo Fisher    | NJTEN3         | 11-7114-82    |
| IL-4                                         | Biolegend        | 11b11          | 504109        |
| IL-6                                         | eBioscience      | MP5-20F3       | 11-7061-82    |
| IL-10                                        | eBioscience      | JES5-16E3      | 11-7101-41    |
| IL13                                         | invitrogen       | eBio13A        | 53-7133-82    |
| IL-33                                        | R&D              | 396118         | IC3626P       |
| Ki67                                         | eBioscience      | SolA15         | 11-5698-80    |
| Ly6C                                         | eBioscience      | HK 1.4         | 17-5932-80    |
| Ly6G                                         | eBioscience      | RB6-8C5        | RM3005        |
| MHC II                                       | Miltenyi Biotec  | REA813         | 130-112-233   |
| NK1.1                                        | BDPharmingen     | PK136          | 561046        |
| Propidium Iodide                             | Sigma            |                | P4170         |
| ROR $\gamma$ t                               | eBioscience      | B2D            | 12-6981-80    |
| Sca1(Ly-6A/E)                                | Biolegend        | E13-161.7      | 122511        |
| Siglec F                                     | BD Bioscience    | E50-2440       | 552126        |
| TNF $\alpha$                                 | Miltenyi         | REA636         | 130-119-561   |
| <b>Antibodies used only for FACSAnalysis</b> |                  |                |               |
| CD45                                         | Miltenyi Biotec  | REA737         | 130-110-665   |
| Siglec F                                     | Miltenyi Biotec  | ES22-10D8      | 130-102-167   |
| Ly6G                                         | Biolegend        | 1A8            | 127624        |

# Appendix Fig. S2

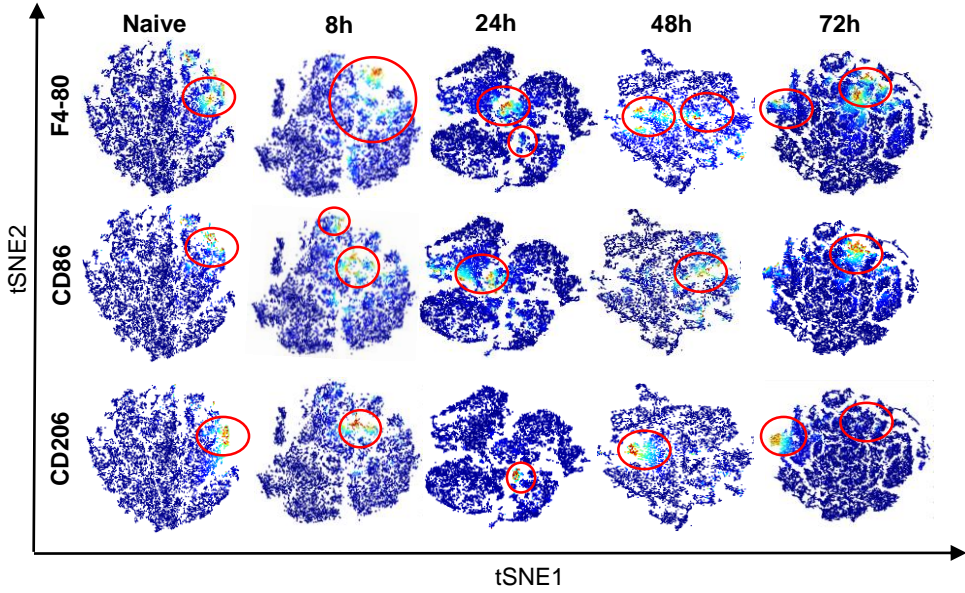

**Fig. S2: MELC-based bioinformatic analysis of macrophage polarization.** tSNE analysis of macrophage polarization based on M1-like (CD86) and M2-like (CD206) markers at various time points after zymosan injection in one hind paw

## Appendix Fig. S3

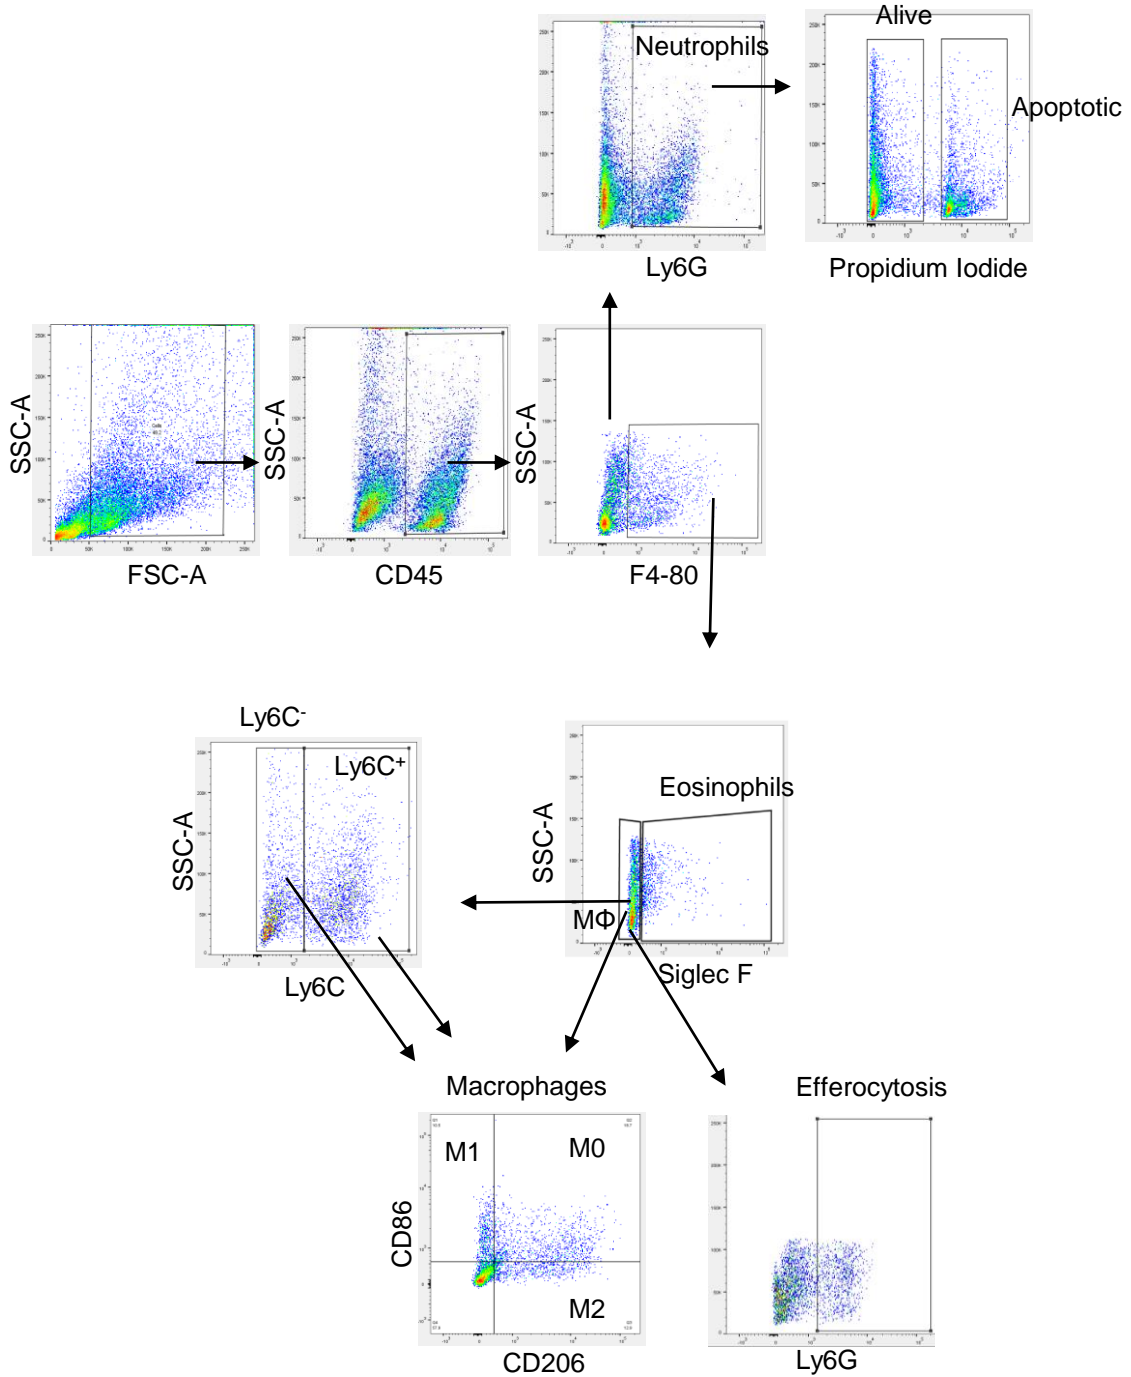

**Fig. S3:** Gating strategy for immune cells and their subtypes in paws after injection of zymosan (10  $\mu$ l, 3 mg/ml). Cells were gated based on their side scatter area (SSC-A) and forward scatter area (FSC-A). Afterwards CD45<sup>+</sup> immune cells were identified. Within F4-80<sup>+</sup> cells Siglec F<sup>-</sup> cells were identified as macrophages and Siglec F<sup>+</sup> cells as eosinophils. F4-80<sup>+</sup> Siglec F<sup>-</sup> macrophages were also further analysed for in resident (Ly6C<sup>-</sup>) and monocyte-derived macrophages (Ly6C<sup>+</sup>). M1-like macrophages were defined as CD86<sup>+</sup>/CD206<sup>-</sup> cells, M2-like macrophages as CD86<sup>-</sup>/CD206<sup>+</sup> cells and double positive macrophages as M0 macrophages. Ly6G<sup>+</sup>/F4-80<sup>-</sup> cells were identified as neutrophils. The neutrophils were divided in dead cells positive for propidium iodide and alive cells negative for propidium iodide.

# Appendix Fig. S4

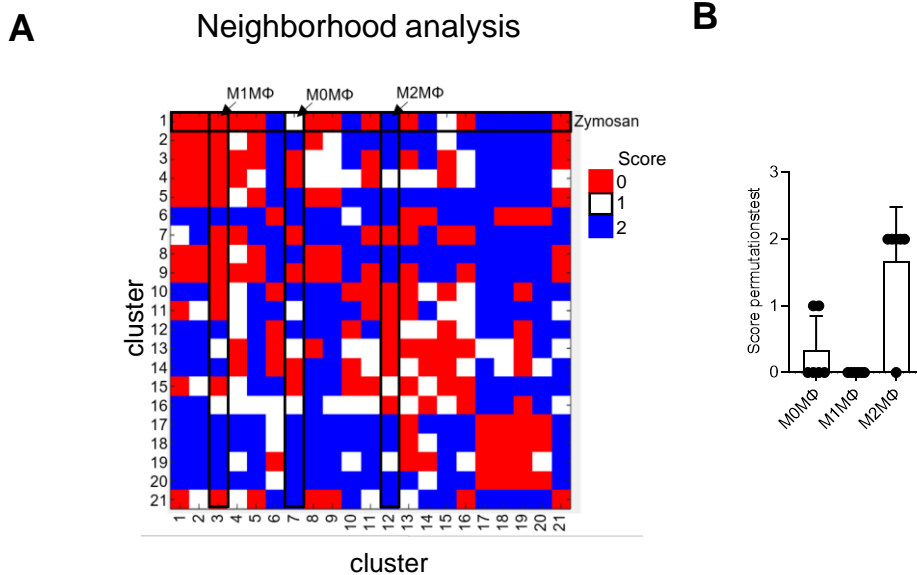

**Fig. S4: MELC-based neighborhood analysis of zymosan and macrophage subpopulations.** (A) Representative analysis of the zymosan neighborhood in inflamed paws 24 h after zymosan injection. Score 0 = neighbors, Score 1 = random distribution, score 2 = no neighbors. (B) Score distribution of macrophage populations determined for the zymosan neighborhood in individual mice 24 h after zymosan injection.

## Appendix Fig. S5

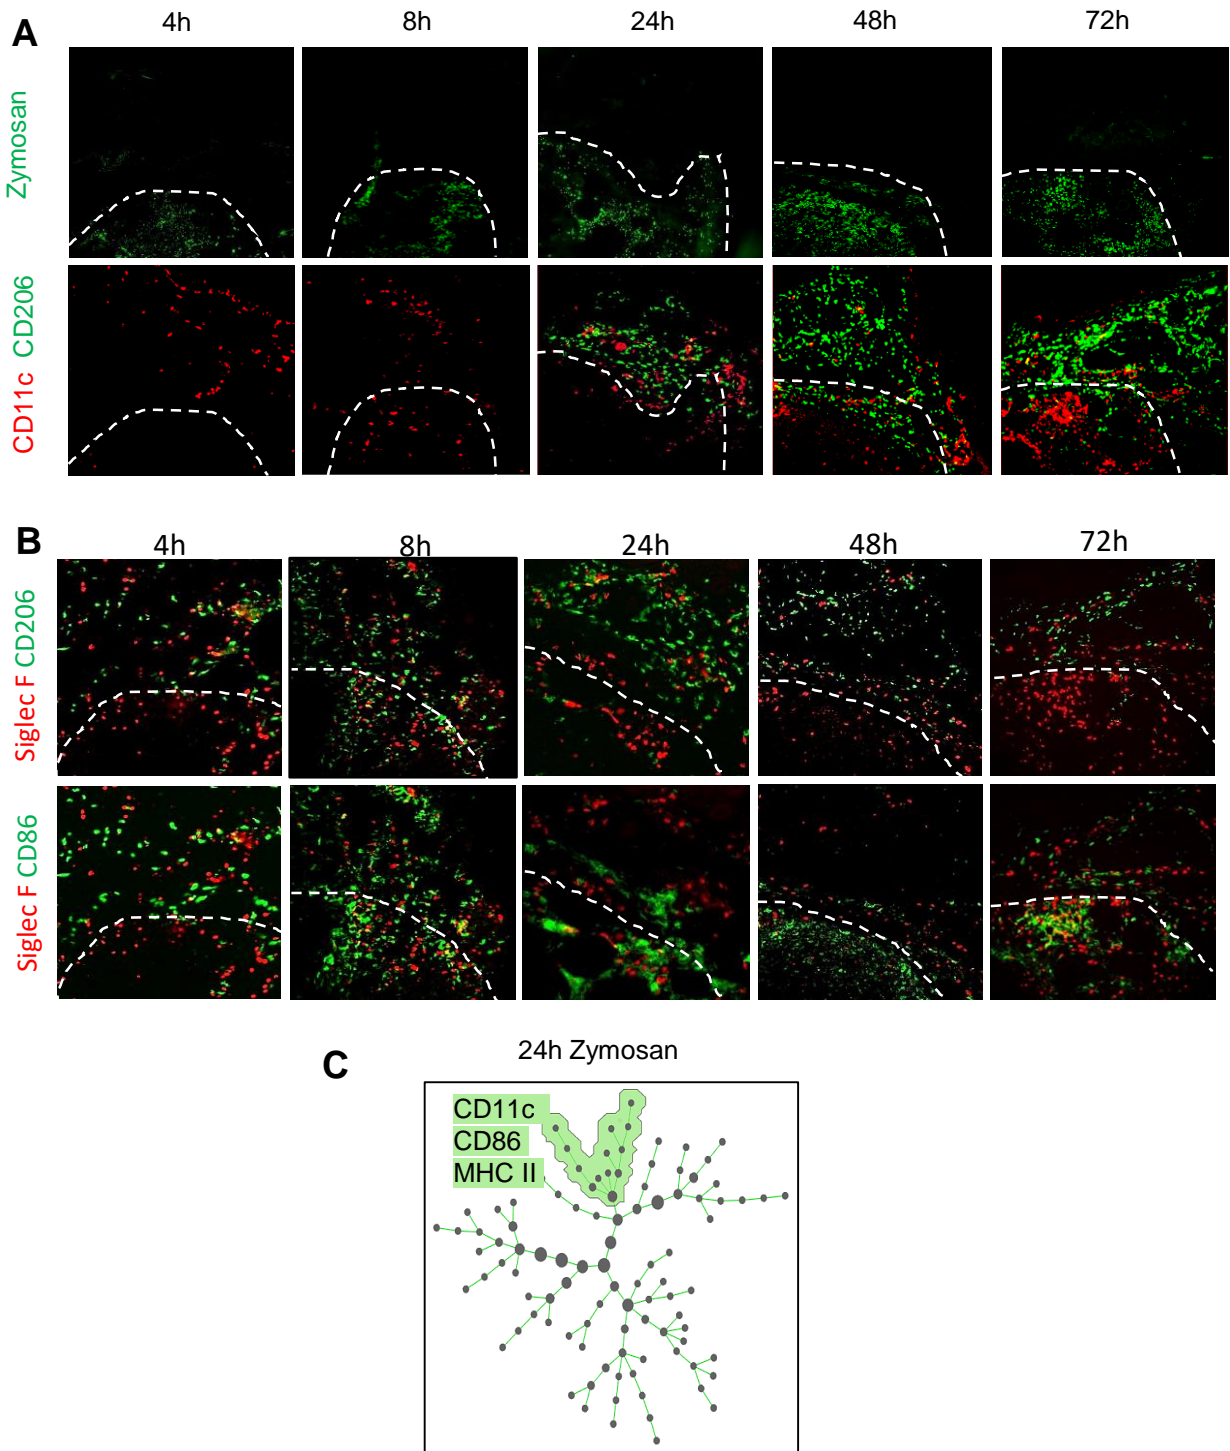

**Fig. S5: MELC analysis for the distribution and dendritic cells and eosinophils. (A, B)** Representative MELC images showing the distribution of DCs (panel A) and eosinophils (panel B) in the inflamed paw at different time points after zymosan injection. The white dotted lines depict the border of the core region. **(C)** SPADE analysis of the distribution of CD11c-expressing clusters 24 hours after zymosan injection in one hind paw.

## Appendix Fig. S6

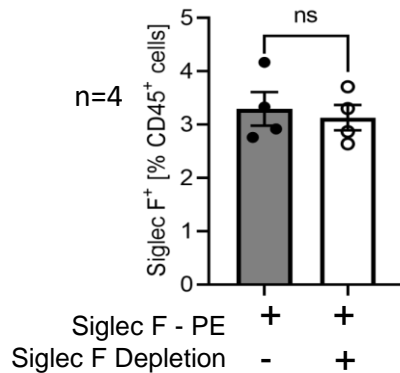

**Fig. S6: The anti Siglec F-depletion antibody does not interfere with binding of the eosinophil detection antibody.** Blood cells were incubated either with the anti-Siglec F FACS antibody (clone ES22-10D8, Miltenyi Biotech) alone or together with equal amounts of the depletion antibody (clone 238047, R&D Systems). Data are mean  $\pm$  S.E.M. (n=4). Students T-test was used. No significance was detected.

## Appendix Fig. S7

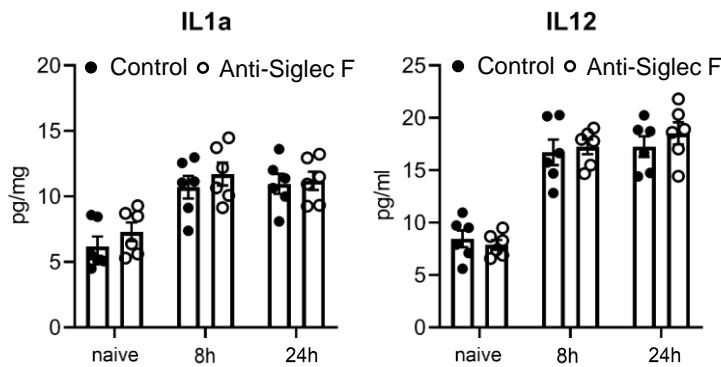

**Fig. S7: Eosinophil-depletion does not alter IL1a and IL12 levels in inflamed hind paws.**

Concentrations of cytokines and chemokines were determined by multiplex cytokine assay 8 and 24 h after injection of zymosan in paws from control or eosinophil-depleted mice. Data are mean  $\pm$  S.E.M. (n=6). Two-way ANOVA. No significance was detected.

## Appendix Fig. S8

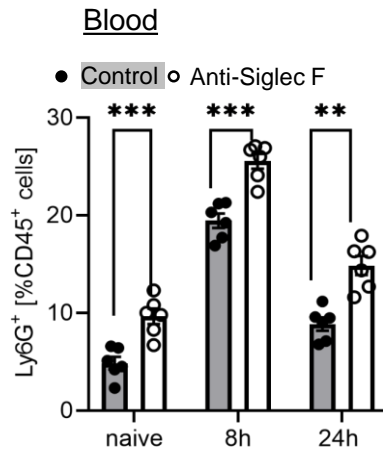

**Fig. S8: FACS analysis of neutrophils in blood.** FACS analysis of the neutrophil count in peripheral blood from control or eosinophil-depleted mice in naïve animals and 8 or 24 hours after zymosan injection. Data are shown as the mean  $\pm$  S.E.M. (n=6). Two-way ANOVA/Bonferroni, \*\*p< 0.01, \*\*\*p< 0.001.
