# Supplementary material for: Eosinophil‐derived IL‐4 is necessary to establish the inflammatory structure in innate inflammation
Source: PubMed Central journal article supplement (PMC9906331; doi:10.15252/emmm.202216796), 2022-12-21
Supplement: EMMM-15-e16796-s007.pdf [file EMMM-15-e16796-s007.pdf]

## Expanded View Figures

Figure EV1. Workflow of the bioinformatic analysis for the MELC images.

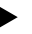

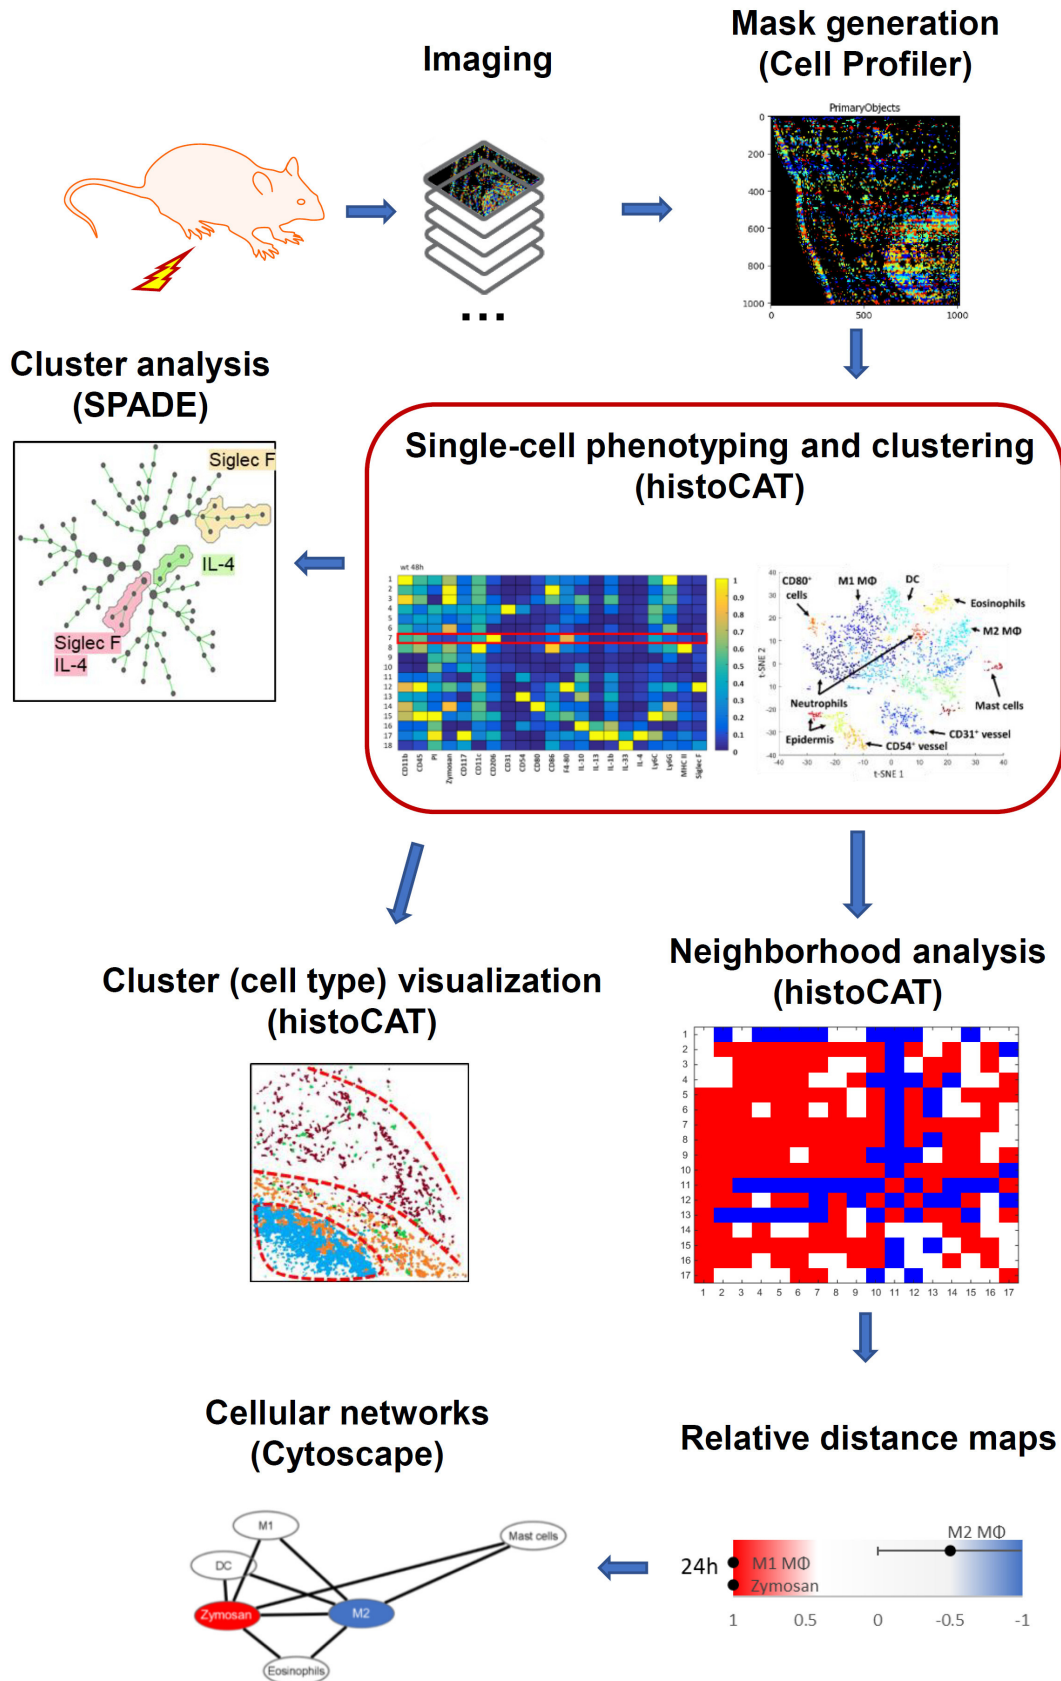

Figure EV1.

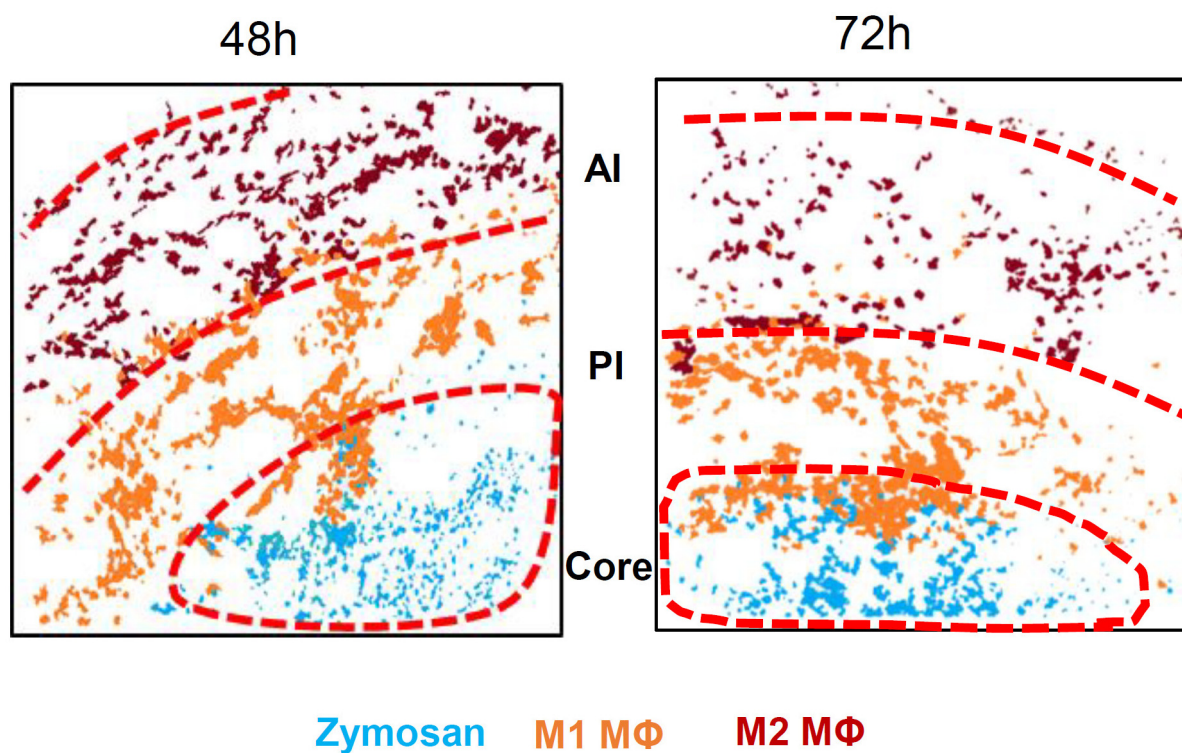

**Figure EV2. Distribution of macrophage subpopulation 48 and 72 h after zymosan injection.**

Composite MELC images 24 and 72 h after zymosan injection showing the position of the core-, PI- and the AI-regions in the tissue in regard to the localization of M1- and M2-like macrophages (MΦ) and zymosan. The red dotted lines depict the area where the transition between the neighboring regions occurs.

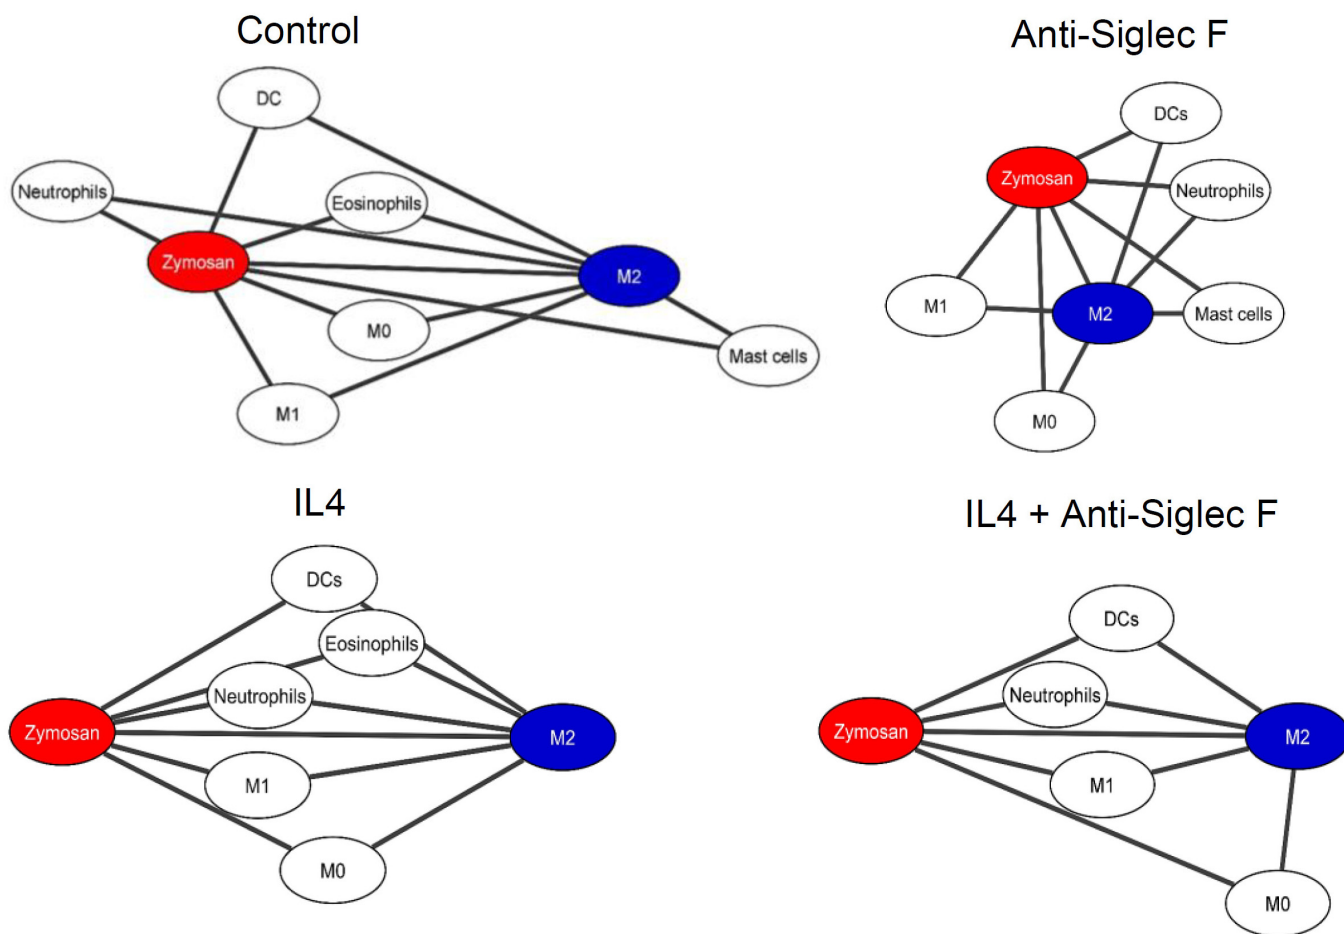

**Figure EV3. Cellular neighborhood networks of zymosan and M2-like macrophages.**

Dual centered network analysis of immune cells 24 h after zymosan injection based on the likelihood for a direct neighborhood of macrophage subtypes in regard to zymosan and M2-like macrophages at the. Data are shown as the mean  $\pm$  SEM ( $n = 5$  mice). Mice were treated with or without anti-Siglec F antibody and IL4c. The distances between the cells in the visualization represents the statistical probability of being direct neighbors.
